# Supplementary material for: Orchid diversity along an altitudinal gradient in the central Balkans
Source: Frontiers journal article supplement (doi:10.3389/fevo.2022.929266), 2022-08-09
Supplement: Table_1.docx [file Table_1.docx]

**Supplementary Material**

**Table S1.** Overview of orchids of the central Balkans (western Serbia) with their specific habitat types: F – taxon that grows in forest habitats, H – taxon that grows in non-forest habitats); life forms: RH – rhizomatous orchids, I – intermediate orchids, T – tuberous orchids; pollination systems: R – rewarding, D – deceptive, S – self-pollinated; and the altitudinal range and mean altitude of occurrence of orchids.

| **Orchid taxon** | **Abbreviation of taxon name** | **Vegetation Type** | **Life form** | **Pollination System** | **Minimum altitude (m)** | **Maximum altitude (m)** | **Altitudinal range (m) = Maximum – Minimum** | **Mean altitude** |
| --- | --- | --- | --- | --- | --- | --- | --- | --- |
| *Anacamptis coriophora* (L.) R.M.Bateman, Pridgeon & M.W.Chase subsp. *coriophora* | Ancor | H | T | R | 104 | 1449 | 1345 | 919.32 |
| *Anacamptis morio* (L.) R.M.Bateman, Pridgeon & M.W.Chase | Anmor | F, H | T | D | 104 | 1750 | 1646 | 943.09 |
| *Anacamptis palustris* subsp. *elegans* (Heuff.) R.M.Bateman, Pridgeon & M.W.Chase | Anpal | H | T | D | 79 | 1160 | 1081 | 815.83 |
| *Anacamptis papilionacea* (L.) R.M.Bateman, Pridgeon & M.W.Chase subsp. *papilionacea* | Anpap | F, H | T | D | 360 | 932 | 572 | 498.08 |
| *Anacamptis pyramidalis* (L.) Rich. | Anpyr | F, H | T | D | 194 | 1500 | 1306 | 686.4 |
| *Cephalanthera damasonium* (Mill.) Druce | Cedam | F | RH | S | 79 | 1600 | 1521 | 863.25 |
| *Cephalanthera longifolia* (L.) Fritsch | Celon | F, H | RH | D | 81 | 1340 | 1259 | 709.81 |
| *Cephalanthera rubra* (L.) Rich. | Cerub | F, H | RH | D | 311 | 1920 | 1609 | 916.4 |
| *Coeloglossum viride* (L.) Hartm. | Covir | F, H | I | R | 650 | 1950 | 1300 | 1385.84 |
| *Corallorhiza trifida* Châtel. | Cotri | F | RH | S | 1050 | 1721 | 671 | 1325 |
| *Dactylorhiza cordigera* (Fr.) Soó subsp. *cordigera* | Dacor | H | I | D | 1247 | 1692 | 445 | 1453.21 |
| *Dactylorhiza fuchsii* (Druce) Soó subsp. *fuchsii* | Dafuc | F, H | I | D | 1178 | 1442 | 264 | 1262.37 |
| *Dactylorhiza incarnata* (L.) Soó subsp. *incarnata* | Dainc | H | I | D | 104 | 1710 | 1606 | 1040.59 |
| *Dactylorhiza maculata* (L.) Soó subsp. *maculata* | Damac | H | I | D | 950 | 1621 | 671 | 1253.65 |
| *Dactylorhiza maculata* subsp. *transsilvanica* (Schur) Soó | Datra | F, H | I | D | 925 | 1423 | 498 | 1086.51 |
| *Dactylorhiza saccifera* (Brongn.) Soó subsp. *saccifera* | Dasac | F, H | I | D | 200 | 1626 | 1426 | 1063.57 |
| *Dactylorhiza sambucina* (L.) Soó | Dasam | F, H | I | D | 310 | 2010 | 1700 | 1285.53 |
| *Epipactis atrorubens* (Hoffm.) Besser | Epatr | F, H | RH | R | 650 | 1850 | 1200 | 1106.78 |
| *Epipactis distans* Arv.-Touv. | Epdis | F, H | RH | R | 1196 | 1246 | 50 | 1222 |
| *Epipactis helleborine* (L.) Crantz subsp. *helleborine* | Ephel | F | RH | R | 80 | 1470 | 1390 | 857.52 |
| *Epipactis leptochila* subsp. *neglecta* Kümpel | Epilep | F | RH | S | 762 | 1404 | 642 | 1076 |
| *Epipactis microphylla* (Ehrh.) Sw. | Epmic | F | RH | R, S | 229 | 1412 | 1183 | 812.32 |
| *Epipactis muelleri* Godfery subsp. *muelleri* | Epmue | F | RH | S | 1190 | 1295 | 105 | 1242.5 |
| *Epipactis palustris* (L.) Crantz | Eppal | H | RH | R, S | 493 | 1400 | 907 | 953.88 |
| *Epipactis pontica* Taubenheim | Eppon | F | RH | S | 770 | 810 | 40 | 787.67 |
| *Epipactis purpurata* Sm. | Eppur | F | RH | R | 516 | 1413 | 897 | 1063.09 |
| *Epipogium aphyllum* Sw. | Epaph | F | RH | R | 1267 | 1512 | 245 | 1389.5 |
| *Goodyera repens* (L.) R.Br. | Gorep | F | RH | R | 550 | 1400 | 850 | 1053.2 |
| *Gymnadenia conopsea* (L.) R.Br. | Gycon | F, H | I | R | 240 | 1920 | 1680 | 1131.54 |
| *Gymnadenia frivaldii* Hampe ex Griseb. | Gyfri | H | I | R | 1612 | 1624 | 12 | 1618.67 |
| *Gymnadenia odoratissima* (L.) Rich. | Gyodo | H | I | R | 175 | 1450 | 1275 | 921.54 |
| *Herminium monorchis* (L.) R.Br. | Hemon | H | T | R | 700 | 700 | 0 | 700 |
| *Himantoglossum calcaratum* (Beck) Schltr. subsp. *calcaratum* | Hical | F, H | T | D | 210 | 1295 | 1085 | 748.3 |
| *Limodorum abortivum* (L.) Sw. | Liabo | F, H | RH | R, S | 220 | 1050 | 830 | 617.44 |
| *Neotinea tridentata* (Scop.) R.M.Bateman, Pridgeon & M.W.Chase subsp. *tridentata* | Netri | F, H | T | D | 278 | 1858 | 1580 | 1025.78 |
| *Neotinea ustulata* (L.) R.M.Bateman, Pridgeon & M.W.Chase | Neust | F, H | T | D | 230 | 1750 | 1520 | 938.85 |
| *Neottia cordata* (L.) Rich. | Necor | F | RH | R | 900 | 1720 | 820 | 1238.14 |
| *Neottia nidus-avis* (L.) Rich. | Nenid | F | RH | R, S | 175 | 1650 | 1475 | 934.47 |
| *Neottia ovata* (L.) Bluff & Fingerh. | Neova | F, H | RH | R | 185 | 2043 | 1858 | 948.62 |
| *Nigritella rhellicani* Teppner & E.Klein | Nirhe | H | I | R | 1200 | 2060 | 860 | 1533.38 |
| *Ophrys apifera* Huds. | Opapi | F, H | T | D, S | 104 | 649 | 545 | 402.17 |
| *Ophrys insectifera* L. subsp. *insectifera* | Opins | F, H | T | D | 175 | 1228 | 1053 | 585.25 |
| *Ophrys scolopax* subsp. *cornuta* (Steven) E.G.Camus | Opcor | F, H | T | D | 104 | 1092 | 988 | 594.65 |
| *Ophrys sphegodes* Mill. subsp. *sphegodes* | Opsph | F, H | T | D | 175 | 350 | 175 | 271.5 |
| *Orchis mascula* subsp. *speciosa* (Mutel) Hegi | Ormas | F, H | T | D | 200 | 1603 | 1403 | 1052.61 |
| *Orchis militaris* L. subsp. *militaris* | Ormil | F, H | T | D | 104 | 1398 | 1294 | 924.91 |
| *Orchis pallens* L. | Orpal | F, H | T | D | 250 | 1411 | 1161 | 775.38 |
| *Orchis purpurea* Huds. subsp. *purpurea* | Orpur | F, H | T | D | 229 | 1295 | 1066 | 617.25 |
| *Orchis simia* Lam. subsp. *simia* | Orsim | F, H | T | D | 271 | 1095 | 824 | 567.53 |
| *Orchis spitzelii* Saut. ex W.D.J.Koch subsp. *spitzelii* | Orspi | F | T | D | 1020 | 1020 | 0 | 1020 |
| *Platanthera bifolia* (L.) Rich. | Plbif | F, H | I | R | 190 | 1750 | 1560 | 988.09 |
| *Platanthera chlorantha* (Custer) Rchb | Plchl | F, H | I | R | 197 | 1432 | 1235 | 776.77 |
| *Pseudorchis albida* (L.) Á.Löve & D.Löve | Psalb | H | I | R | 1750 | 2010 | 260 | 1880 |
| *Spiranthes spiralis* (L.) Chevall. | Spspi | H | T | R | 104 | 1200 | 1096 | 554.27 |
| *Traunsteinera globosa* (L.) Rchb. | Trglo | H | T | D | 708 | 1750 | 1042 | 1290.78 |
